REVIEW ARTICLES

# Incidence of postoperative death and acute kidney injury associated with i.v. 6% hydroxyethyl starch use: systematic review and meta-analysis

M. A. Gillies<sup>1\*</sup>, M. Habicher<sup>2</sup>, S. Jhanji<sup>3</sup>, M. Sander<sup>2</sup>, M. Mythen<sup>4</sup>, M. Hamilton<sup>5</sup> and R. M. Pearse<sup>6</sup>

<sup>1</sup> Department of Critical Care, Royal Infirmary of Edinburgh, Little France Crescent, Edinburgh EH16 4SA, UK

<sup>2</sup> Charité-Universitätsmedizin Berlin, Campus Charité Mitte, Charitéplatz 1, Berlin D-10117, Germany

<sup>3</sup> Royal Marsden Hospital, London SW3 6JJ, UK

<sup>4</sup> University College Hospital, London NW1 2BU, UK

<sup>5</sup> St George's Healthcare NHS Trust, London SW17 0QT, UK

<sup>6</sup> Barts and the London School of Medicine and Dentistry, Queen Mary's University of London, London EC1M 6BQ, UK

\* Corresponding author. E-mail: michael.gillies@ed.ac.uk

## Editor's key points:

- The use of hydroxyethyl starch (HES) solutions has been linked to an increase in in-hospital mortality by some clinical studies, but results have been conflicting.
- HES solutions have also been implicated in causing kidney injury.
- This systematic review and meta-analysis identified no consistent effect on mortality or renal function when reviewing 456 and incorporating 19 research papers.
- However, no positive effect was also found, and the authors conclude that they are unable to recommend the continued use of 6% HES solutions.

**Background.** Trials suggest that the use of i.v. hydroxyethyl starch (HES) solutions is associated with increased risk of death and acute kidney injury (AKI) in critically ill patients. It is uncertain whether similar adverse effects occur in surgical patients.

**Methods.** Systematic review and meta-analysis of trials in which patients were randomly allocated to 6% HES solutions or alternative i.v. fluids in patients undergoing surgery. Ovid Medline, Embase, Cinhal, and Cochrane Database of Systematic Reviews were searched for trials comparing 6% HES with clinically relevant non-starch comparator. The primary end-point was hospital mortality. Secondary endpoints were requirement for renal replacement therapy (RRT) and author-defined AKI. Pre-defined subgroups were cardiac and non-cardiac surgery.

**Results.** Four hundred and fifty-six papers were identified; of which 19 met the inclusion criteria. In total, 1567 patients were included in the analysis. Dichotomous outcomes were expressed as a difference of proportions [risk difference (RD)]. There was no difference in hospital mortality [RD 0.00, 95% confidence interval (CI) -0.02, 0.02], requirement for RRT (RD -0.01, 95% CI -0.04, 0.02), or AKI (RD 0.02, 95% CI -0.02 to 0.06) between compared arms overall or in predefined subgroups.

**Conclusions.** We did not identify any differences in the incidence of death or AKI in surgical patients receiving 6% HES. Included studies were small with low event rates and low risk of heterogeneity. Narrow CIs suggest that these findings are valid. Given the absence of demonstrable benefit, we are unable to recommend the use of 6% HES solution in surgical patients.

**Keywords:** hetastarch; meta-analysis; surgery

Accepted for publication: 2 July 2013

Approximately 230 million patients undergo surgery each year with reported mortality rates between 1 and 4%.<sup>1,2</sup> There is great interest in the optimal approach to i.v. fluid therapy in the perioperative period, which may have important effects on patient outcomes.<sup>3</sup> The choice of i.v. fluid solution is a central aspect of fluid therapy, but the evidence base informing this decision is limited with wide international variations in practice.<sup>4</sup> Hydroxyethyl starch (HES) solutions, which are derived from maize or potato starch, are commonly used for i.v. fluid therapy. Modern starches are typically presented in a

concentration of 6%, molecular weights (MWs) of 130–200 kDa, and a molecular substitution ratio of 0.4 or 0.42 (tetra-starches). Older starch solutions have higher substitution ratios [e.g. 0.5 (pentastarch) and 0.7 (hetastarch)]; some of these solutions are still commercially available.<sup>5</sup> The findings of two recent large randomized trials have suggested a small but important increase in the incidence of acute kidney injury (AKI) and mortality associated with the use of HES solutions in critically ill patients.<sup>6,7</sup> Potential mechanisms for starch-mediated kidney injury are unclear, but may be associated with more concentrated

solutions (e.g. HES 10) and also molecules with high MW and greater degree of substitution.<sup>5 8 9</sup> Concerns have also been raised regarding the effects of HES on the coagulation profile. It now seems likely that these solutions will be withdrawn from practice in the care of critically ill patients.<sup>10 11</sup>

However, the generalizability of these findings to other patient groups is uncertain and the use of HES for i.v. volume replacement continues in cardiac and non-cardiac surgical patients. There is a paucity of quality data regarding the safety of starch solutions in the surgical population. To compound matters, several studies investigating the use of HES in surgical patients which were conducted by Joachim Boldt have been retracted after allegations of scientific misconduct.<sup>12</sup> At least five meta-analyses on the safety of starch have been published in the last 3 yr.<sup>13–17</sup> The majority of these reviews have focused on the use of starch in critically ill, septic, or acutely unwell adults.<sup>13–15</sup> Three of these studies have considered the safety of starch in other groups. The extensive systematic review and meta-analysis conducted by Dart and colleagues included a non-sepsis subgroup largely (but not exclusively) composed of surgical trials.<sup>13</sup> Two further reviews and meta-analyses focus on the use of starch primarily in surgical patients,<sup>15 16</sup> but these are limited because they evaluate only the effects of tetra-starch, in some cases in comparison with other starch solutions, and include a heterogeneous group of studies, including those undertaken in trauma, burns, paediatric, and transplant surgery. We undertook a systematic review and meta-analysis on the effect of all 6% HES solutions compared with non-starch solutions in clinical use on mortality and AKI exclusively in the adult surgical population.

## Methods

### Search strategy

Ovid Medline (1946–present), Embase, Cinhal, and Cochrane Database of Systematic Reviews were searched for suitable studies using the following search strategy: Starch.mp or starch/OR Hetastarch.mp or hetastarch/OR Voluven.mp OR Volulyte.mp OR Haes-steril.mp OR Hespan.mp OR Tetraspan.mp AND Surgery.mp or General Surgery/. Search results were limited to randomized controlled trials in adult subjects. Non-English language papers were included. The bibliographies of evaluable studies and other selected papers were hand searched. Experts were contacted to ascertain if they were aware of any other studies not identified by our search strategy. The literature search was conducted independently by two authors (M. Habicher and S.J.). Disparities in the literature search were resolved by consensus of all authors. Search strategy and analysis were carried out according to the 'Preferred Reporting Items for Systematic Review and Meta-analysis' (PRISMA) statement 2009.<sup>18</sup>

### Study selection criteria

Search results were reviewed and evaluated independently by two authors (R.M.P. and M.S.). Randomized controlled trials (RCTs) in surgical patients were included where hospital mortality, requirement for postoperative renal replacement therapy

(RRT), or author-defined postoperative AKI were reported. Trials comparing perioperative administration of 6% HES of any MW or substitution ratio with any non-starch fluid were included, with the exception of trials where comparator fluids were experimental haemoglobin-based fluids (MPOX4 and HBOC21) and hypertonic saline. Trials in subjects undergoing all types of surgery were considered with the exception of neurosurgery, transplantation, burns, or obstetric surgery. Studies where Joachim Boldt was a named author were also excluded. Studies were screened for methodological quality using the Jadad score, an established method of assessing methodological quality of studies to be included in meta-analysis.<sup>19</sup> Assessment was made of the appropriateness of randomization, blinding, and whether patient withdrawal information was provided. The maximum score attributable was 5. Only studies with a Jadad score of  $\geq 3$  were included. Disagreements on studies to be included in the final analysis were resolved by consensus within the whole group.

### Data extraction

Data extracted for each eligible study included: author; year of publication; surgical group studied; number of subjects; starch used; comparator fluid used; primary and other study outcomes; commercial support; hospital mortality; incidence of postoperative RRT; and incidence of author-defined AKI (where reported).

### Outcomes

Primary outcomes studied were hospital mortality and post-operative requirement for RRT. Secondary outcome was the incidence of author-defined postoperative AKI. If data on mortality were not reported, data on AKI or RRT were used; conversely, if data on mortality only were available, then this was used. It was decided *a priori* that a subgroup analysis would be performed on patients undergoing cardiac surgery.

### Statistical analysis

Statistical analysis was carried out using Review Manager (RevMan, v5.2). RevMan is the software used for preparing and maintaining Cochrane Reviews and forms part of the Cochrane Information Management System. Between-study statistical heterogeneity was assessed by  $\chi^2$  and  $I^2$  tests; values of the index of 25, 50, and 75% indicated the presence of low, moderate, and high between-trial heterogeneity, respectively. A *P*-value of 0.1 was considered to denote the statistical significance of heterogeneity. Estimation of potential publication bias used the funnel plot method for any of the outcomes, either primary or secondary. Dichotomous outcomes were expressed as a difference of proportions [risk difference (RD)]. For all analyses performed, if no significant heterogeneity was noted, fixed effect model (FEM) analysis using the Mantel–Haenszel method was used; otherwise, results of the random-effects model analysis using the DerSimonian–Laird method were presented.

# Results

## Study selection

The process for literature search and study selection is outlined in Figure 1. Four hundred and fifty-six non-duplicate citations were screened; of which, 34 studies underwent full scoring and data extraction. However, only 19 trials were suitable for inclusion in the meta-analysis, including a total of 1567 subjects.<sup>9 20–37</sup>

## Characteristics of included studies

The characteristics of included studies are summarized in Table 1. Two trials were multicentre trials, the remainder were single-centre trials. In 10 studies, the subjects were undergoing

cardiac surgery; two studies were of patients undergoing major vascular surgery and one was a mixture of cardiac and major vascular surgery. The study undertaken by Gondos and colleagues was in a mixed group of surgical patients including those undergoing cardiac surgery. Two trials used HES 450/0.7 and one HES 400/0.7; the remainder used molecular sizes of  $\leq 200$  kDa. Comparators included crystalloid solutions, gelatin solutions, and albumin. In seven studies, there was a commercial sponsor. Funnel plot of studies used in the hospital mortality analysis showed no evidence of publication bias (Supplementary material). Studies excluded after full scoring and data extraction were conducted are summarized in Table 2. In six of these studies, hospital mortality, incidence of RRT, or AKI was not reported.<sup>38–43</sup> The remainder were excluded, because the

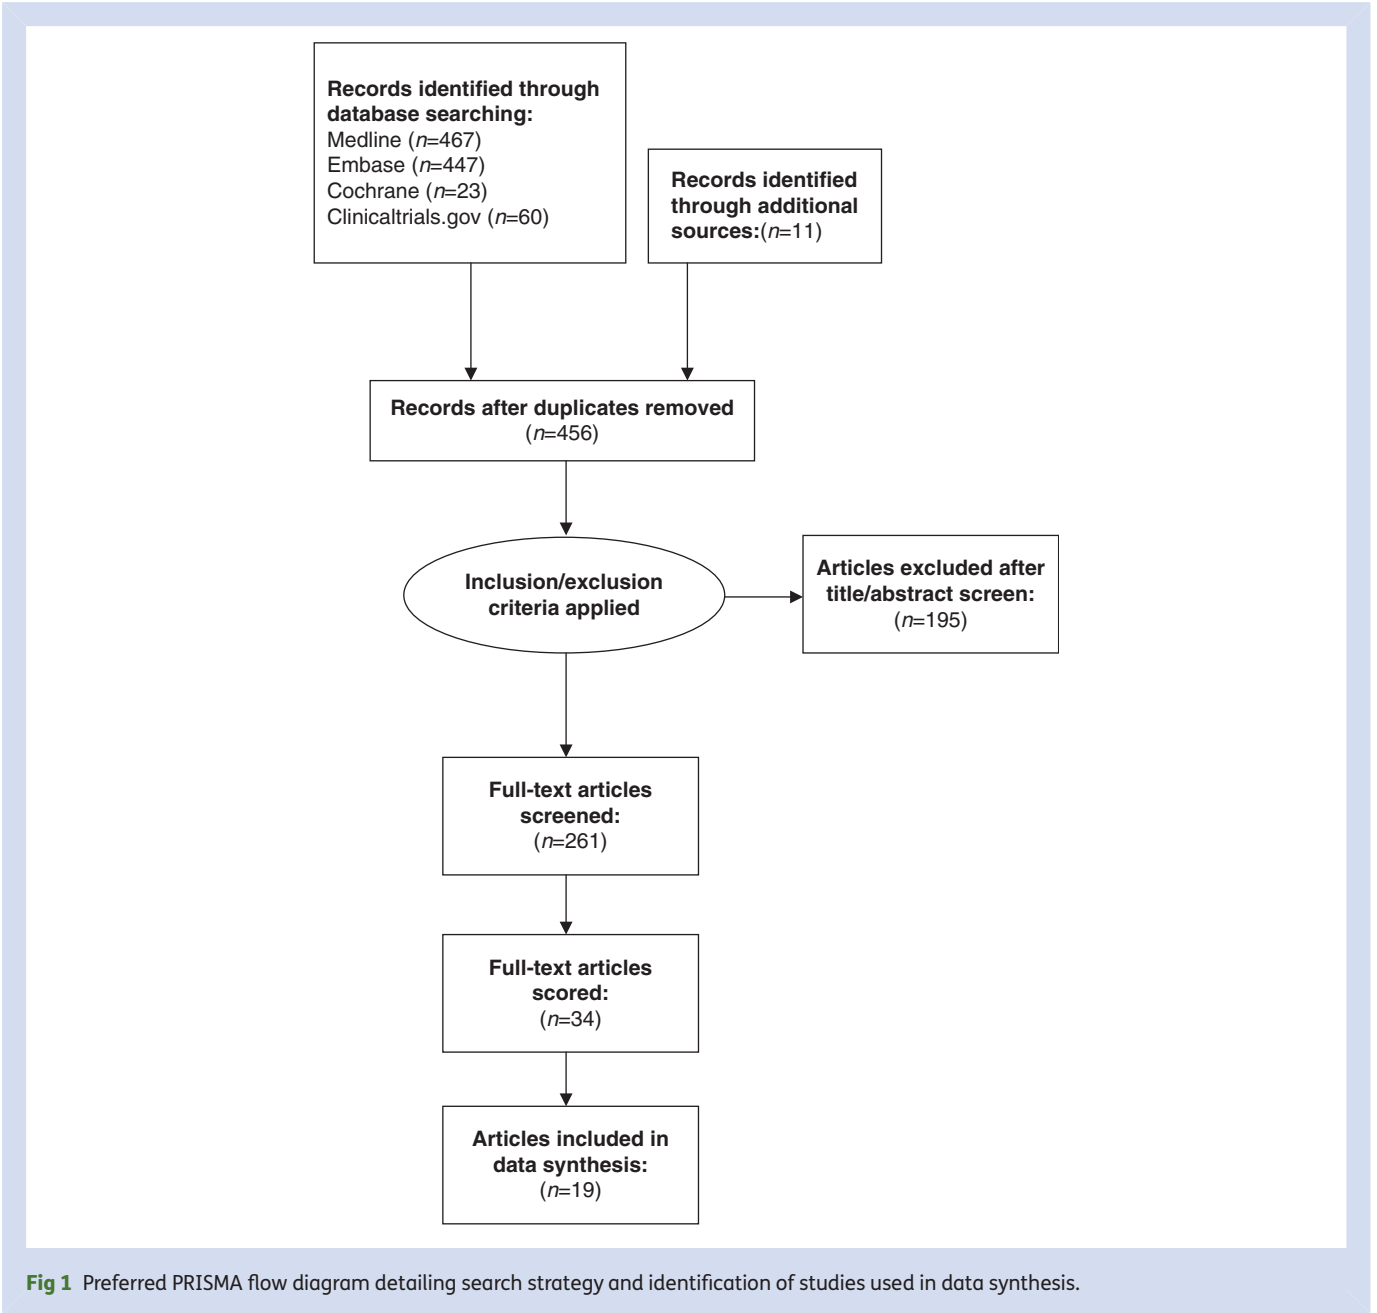

**Table 1** Characteristics of included studies. RRT, renal replacement therapy; AKI, acute kidney injury; SCr, serum creatine; AKIN, Acute Kidney Injury Network

| Study                                       | Design          | Type of surgery           | n   | Starch                                          | Comparator                 | Jadad score | Reports mortality | Reports RRT | Reports AKI | Author-defined AKI                                         | Commercial support |
|---------------------------------------------|-----------------|---------------------------|-----|-------------------------------------------------|----------------------------|-------------|-------------------|-------------|-------------|------------------------------------------------------------|--------------------|
| Alavi and colleagues <sup>20</sup>          | RCT             | Cardiac                   | 92  | 6% HES 130/0.4                                  | 4% gelatin, RL             | 3           | Yes               | No          | No          | –                                                          | Not stated         |
| Dehne and colleagues <sup>21</sup>          | RCT             | ENT                       | 60  | 6% HES-200/0.5: 6% HES-200/0.62: 6% HES-450/0.7 | RL                         | 4           | Yes               | No          | No          | –                                                          | Fresenius          |
| Diehl and colleagues <sup>22</sup>          | RCT             | Cardiac                   | 60  | 6% HES-450/0.7                                  | 5% albumin                 | 3           | Yes               | No          | Yes         | SCr > 1.5 mg dl <sup>-1</sup>                              | Not stated         |
| Feldheiser and colleagues <sup>23</sup>     | RCT             | Gynaecological            | 50  | 6% HES 130/0.4                                  | Balanced crystalloid       | 4           | Yes               | No          | No          | –                                                          | Fresenius-Kabi     |
| Godet and colleagues <sup>24</sup>          | Multicentre RCT | Vascular                  | 65  | 6% HES 130/0.4                                  | 3% gelatin                 | 4           | Yes               | Yes         | Yes         | Increase in SCr from baseline of > 0.5 mg dl <sup>-1</sup> | Fresenius-Kabi     |
| Gondos and colleagues <sup>25</sup>         | Multicentre RCT | Mixed                     | 200 | 6% HES 130/0.4                                  | RL, 4% gelatin, 5% albumin | 3           | Yes               | No          | No          | –                                                          | Fresenius-Kabi     |
| Guo and colleagues <sup>26</sup>            | RCT             | Gynaecological            | 42  | 6% HES-200/0.5                                  | RL                         | 3           | Yes               | Yes         | No          | –                                                          | Not stated         |
| Hecht-Dolnik and colleagues <sup>9</sup>    | RCT             | Cardiac                   | 156 | 6% hetastarch                                   | 5% albumin                 | 4           | Yes               | No          | No          | –                                                          | None               |
| Hung and colleagues <sup>27</sup>           | RCT             | Vascular                  | 84  | 6% HES 130/0.4                                  | RL                         | 4           | Yes               | Yes         | Yes         | Not specified                                              | Edwards            |
| Kuitunen and colleagues <sup>28</sup>       | RCT             | Cardiac                   | 45  | 6% HES 120/0.7: 6% HES 400/0.7                  | 4% albumin                 | 4           | Yes               | No          | No          | –                                                          | Not stated         |
| Lee and colleagues <sup>29</sup>            | RCT             | Cardiac                   | 106 | 6% HES 130/0.4                                  | RL                         | 3           | No                | Yes         | Yes         | AKIN criteria                                              | None               |
| Mahmood and colleagues <sup>30</sup>        | RCT             | Vascular                  | 62  | 6% HES 200/0.6: 6% HES 130/0.4                  | 4% gelatin                 | 4           | Yes               | Yes         | No          | –                                                          | Fresenius-Kabi     |
| Marik and colleagues <sup>31</sup>          | RCT             | Vascular                  | 30  | 6% hetastarch                                   | RL                         | 4           | Yes               | No          | No          | –                                                          | Not stated         |
| Munsch and colleagues <sup>32</sup>         | RCT             | Cardiac                   | 40  | 6% HES-450/0.7                                  | Plasma protein fraction    | 3           | Yes               | No          | No          | –                                                          | Not stated         |
| Ooi and colleagues <sup>33</sup>            | RCT             | Cardiac                   | 90  | 6% HES 130/0.4                                  | 4% gelatin                 | 4           | Yes               | Yes         | Yes         | Not specified                                              | Not stated         |
| Sirvinskas and colleagues <sup>34</sup>     | RCT             | Cardiac                   | 80  | NaCl 0.72%/6% HES                               | RL                         | 3           | Yes               | No          | No          | –                                                          | Not stated         |
| Van der Linden and colleagues <sup>35</sup> | RCT             | Cardiac                   |     | 6% HES-200/0.5                                  | 3.5% gelatin               | 3           | Yes               | No          | No          | –                                                          | Not stated         |
| van der Linden and colleagues <sup>36</sup> | RCT             | Cardiac                   | 132 | 6% HES 130/0.4 (Voluven)                        | 3% gelatin                 | 3           | Yes               | No          | No          | –                                                          | Not stated         |
| Verheij and colleagues <sup>37</sup>        | RCT             | Cardiac or major vascular | 67  | 6% HES 200/0.5                                  | 4% gelatin, NaCl 0.9%      | 4           | Yes               | No          | No          | –                                                          | Braun              |

**Table 2** Articles scored but not included in data synthesis. HES, hydroxylethyl starch; AKI, acute kidney injury; RRT, renal replacement therapy; HBOC-21 and MP4-OX are artificial haemoglobin solutions

| Paper                                       | n   | Reason excluded                                                            |
|---------------------------------------------|-----|----------------------------------------------------------------------------|
| Ando and colleagues <sup>38</sup>           | 21  | Jadad score <3; incidence of hospital mortality, RRT, and AKI not reported |
| Belcher and colleagues <sup>39</sup>        | 73  | Jadad score <3; incidence of hospital mortality, RRT, and AKI not reported |
| Challand and colleagues <sup>50</sup>       | 179 | Control group received HES solution                                        |
| Harten and colleagues <sup>40</sup>         | 29  | Incidence of hospital mortality, RRT, and AKI not reported                 |
| Honkonen and colleagues <sup>44</sup>       | 49  | Comparator hypertonic saline                                               |
| Kasper and colleagues <sup>45</sup>         | 13  | Comparator HBOC-21                                                         |
| Magder and colleagues <sup>46</sup>         | 237 | Control group given HES solution                                           |
| Mukhtar and colleagues <sup>51</sup>        | 40  | Population studied liver transplant surgery                                |
| Olofsson and colleagues <sup>47</sup>       | 189 | Comparator MP4-OX                                                          |
| Senagore and colleagues <sup>41</sup>       | 64  | Incidence of hospital mortality, RRT, and AKI not reported                 |
| Shahbazi and colleagues <sup>42</sup>       | 70  | Incidence of hospital mortality, RRT, and AKI not reported                 |
| Sirieux and colleagues <sup>48</sup>        | 64  | Control group given HES solution                                           |
| Standl and colleagues <sup>49</sup>         | 12  | Comparator HBOC-21                                                         |
| Tiryakioglu and colleagues <sup>43</sup>    | 140 | Jadad score <3; incidence of hospital mortality, RRT, and AKI not reported |
| Van Der Linden and colleagues <sup>54</sup> | 274 | Comparator MP4-OX                                                          |

comparator fluid was not valid,<sup>38 44–50</sup> or because the study population underwent transplant surgery.<sup>51</sup>

## Primary outcomes

### Hospital mortality

Hospital mortality was available in 18 of the 19 included RCTs, which include a total of 1461 patients. Of the 685 patients receiving HES, 19 (2.8%) died and of 776 patients receiving comparator fluid, 46 (5.9%) died. There were no deaths in 12 of the 18 included studies. There was no difference in mortality between compared arms [ $P=0.91$ ,  $I^2=0\%$ ; FEM: RD=0.00, 95% confidence interval (CI)  $-0.02$ ,  $0.02$ ]. Subgroup analysis of studies of 872 cardiac surgery patients from 10 studies also did not demonstrate any difference ( $P=1.0$ ,  $I^2=0\%$ ; FEM: RD 0.00, 95% CI  $-0.02$  to  $0.01$ ) (Fig. 2).

## Secondary outcomes

### Incidence of author-defined AKI

Data on postoperative incidence of author-defined AKI were available in 5 of the 19 trials included, which include a total of 401 patients. Of the 204 patients receiving HES, 11 (5.4%) developed author-defined AKI and in 197 patients receiving comparator fluid, 7 (3.6%) developed author-defined AKI. In two studies, no patient developed author-defined AKI. No difference in the incidence of author-defined AKI was observed between compared arms ( $P=0.34$ ,  $I^2=0\%$ ; FEM: RD 0.02, 95% CI  $-0.02$ ,  $0.06$ ). Two of these studies ( $n=196$ ) were undertaken in cardiac surgery patients. No difference was observed in author-defined AKI between arms ( $P=0.56$ ,  $I^2=0\%$ ; FEM: RD 0.01, 95% CI  $-0.02$ ,  $0.04$ ) (Fig. 3).

### Requirement for postoperative renal replacement therapy

Data on new requirement for postoperative RRT were available in 6 of the 19 included RCTs, which include a total of 445

patients. Of the 233 patients receiving HES, four developed a new requirement for postoperative RRT (1.7%) and of the 212 patients receiving comparator fluid, 4 (1.9%) developed new requirement for postoperative RRT. There were no instances of new requirement for postoperative RRT in two of these studies. No difference in the incidence of new requirement for postoperative RRT was observed between compared arms ( $P=0.62$ ,  $I^2=0\%$ ; FEM: RD  $-0.01$ , 95% CI  $-0.04$ ,  $0.02$ ) (Fig. 4).

## Studies involving tetrastach only

Nine studies ( $n=856$ ) compared tetrastach (substitution ratio of 0.4 or 0.42) with other non-starch fluids. Analysis of these studies did not detect any difference in either mortality ( $n=750$ ,  $P=0.83$ ,  $I^2=0\%$ ; FEM: RD 0.00, 95% CI  $-0.04$  to  $0.04$ ) or new requirement for RRT ( $n=382$ ,  $P=0.73$ ,  $I^2=0\%$ ; FEM: RD  $-0.01$ , 95% CI  $-0.04$  to  $0.03$ ) (Supplementary material).

## Discussion

The principal finding of this systematic review and meta-analysis was that there was no difference in hospital mortality associated with the use of 6% HES solution in the treatment of patients undergoing surgery. Similarly, there were no differences in the secondary outcomes of AKI and the use of RRT. These findings were consistent in subgroup analyses of patients undergoing cardiac and non-cardiac surgery and in patients receiving tetrastach only.

In total, 19 studies with <1600 participants were suitable for inclusion in the meta-analysis. Seven of the included studies were commercially sponsored, raising the possibility of publication bias (although we found no evidence of this). Despite widespread use for more than three decades, studies comparing perioperative use of HES with other i.v. fluids are small, largely single centre and vulnerable to bias. The most likely cause of HES-associated harm (and hence increased mortality) in the critically ill is causation or exacerbation of kidney injury. However,



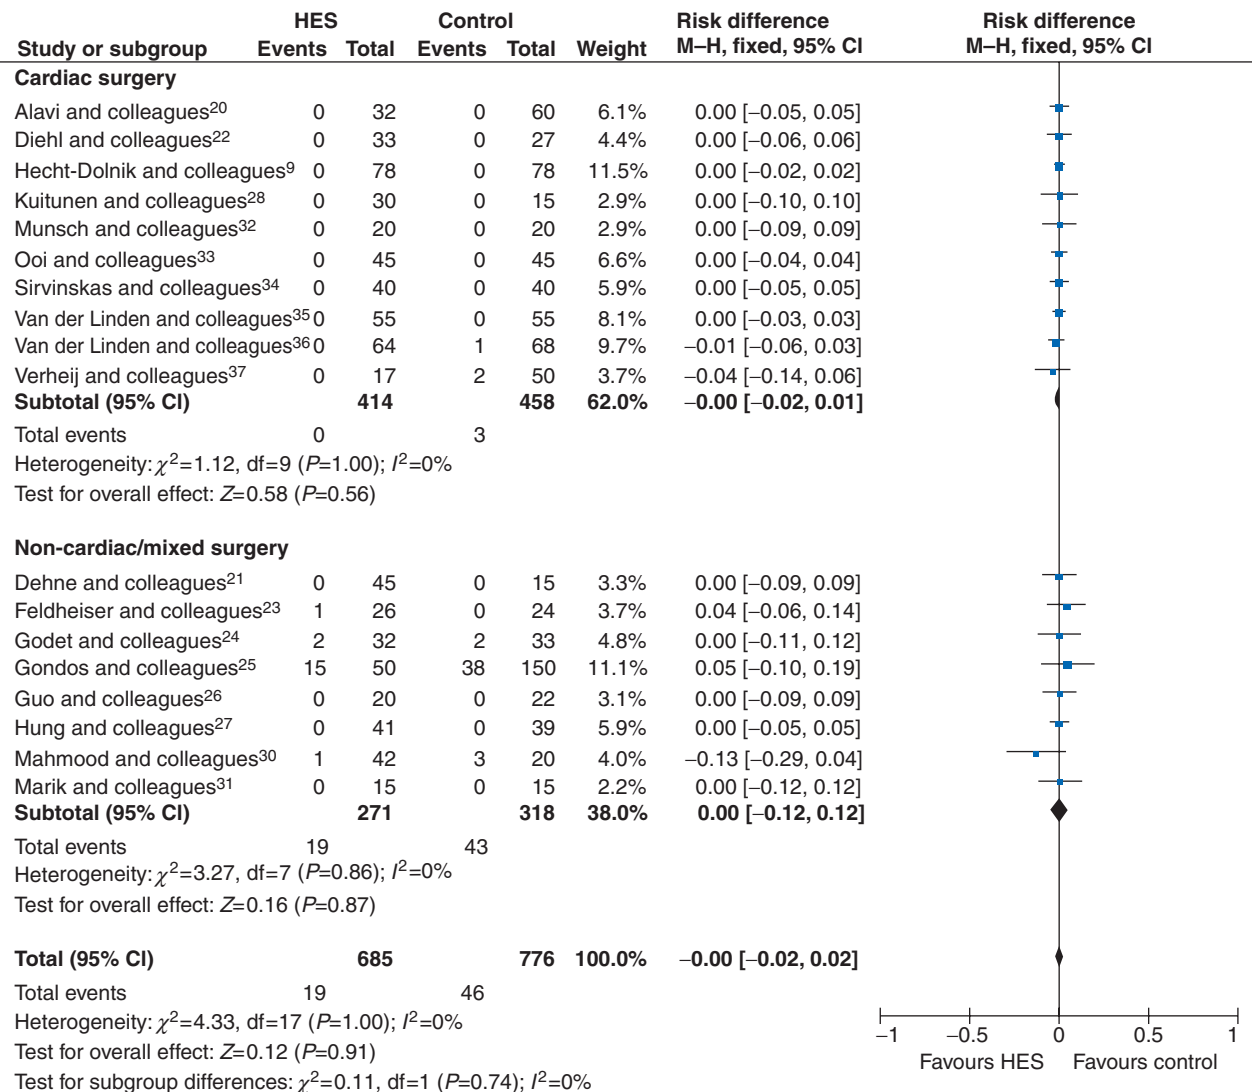

Fig 2 Forest plot of hospital mortality.

data describing kidney-associated harm are not well reported. Few studies consistently report the requirement for RRT or AKI using internationally defined criteria [e.g. Acute Kidney Injury Network (AKIN) and RIFLE Classification]<sup>52</sup> and in those that did, patients may not have been systematically followed up for these outcomes. All studies reporting postoperative RRT describe either no difference or increased use of RRT in the HES group; however, this tendency towards increased use of RRT in the HES group was not statistically significant. The incidence of death, use of RRT and AKI is higher in the critically ill than in the surgical population and it is therefore possible that the low event rates for both death and AKI in included studies resulted in insufficient statistical power to detect a difference in these outcomes. It remains possible that HES solutions are associated with either undetected harm or benefit in the surgical population. We believe that our approach offers significant advantages over previously published work investigating the effects of starch

solutions in surgical patients. The non-sepsis subgroup of the meta-analysis undertaken by Dart and colleagues included studies by Boldt, and those enrolling trauma paediatric and renal transplant patients. They also include four studies of 10% HES which is no longer in common use.<sup>13</sup> The study by Van der Linden and colleagues<sup>17</sup> also included studies of paediatric patients, trauma and burns. These heterogeneous groups were excluded from our analysis. The reviews conducted by Van der Linden and colleagues and Martin and colleagues only investigated tetrastarch and compared it with other solutions, including alternative HES solutions. Moreover, Martin's study, which appears to be industry initiated, investigated only a single product (6% HES 130/0.4, Voluven, Fresenius, Germany). The authors of this study made no assessment of methodological quality of included studies, were supported by Fresenius-Kabi, manufacturers of the HES solution, Voluven, and utilized their 'study tracking system' for the literature search.<sup>16</sup> Several

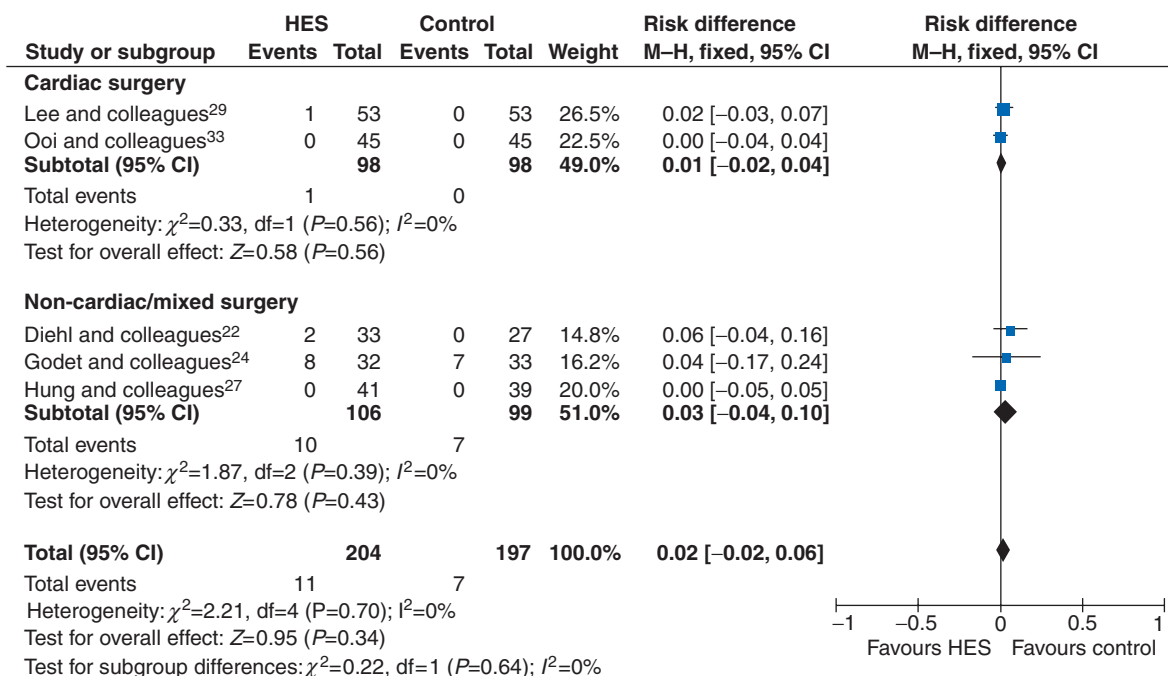

Fig 3 Forest plot of acute kidney injury.

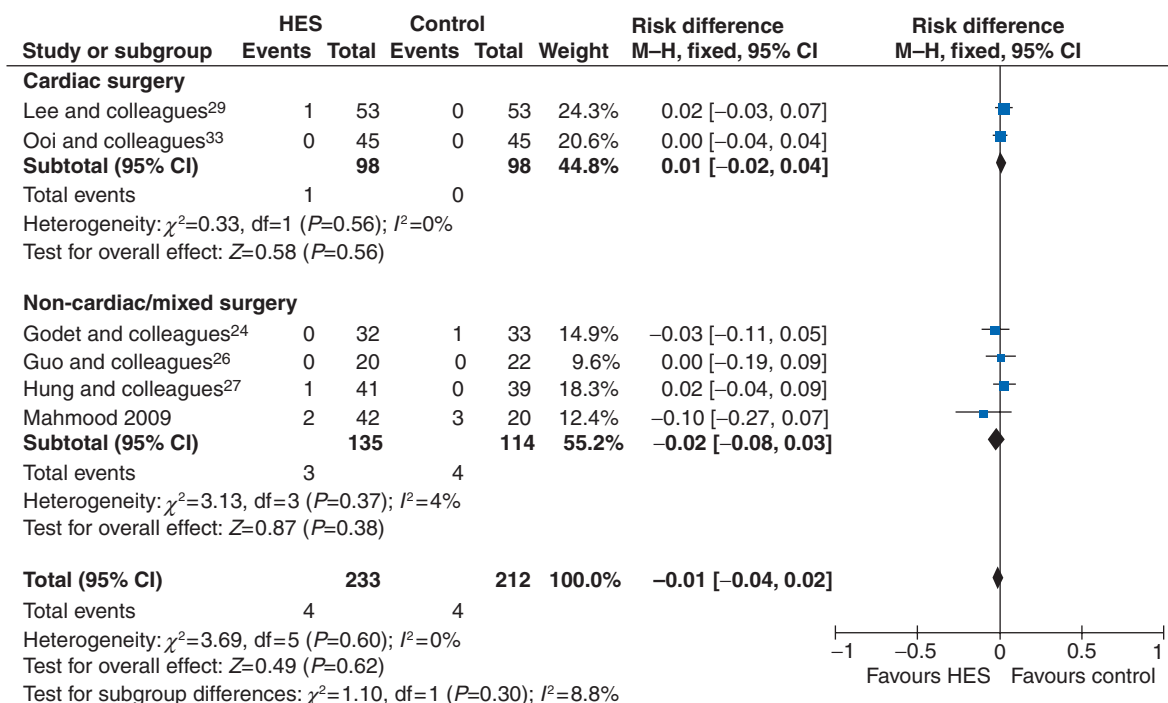

Fig 4 Forest plot of renal replacement therapy.

studies included in other meta-analyses were excluded in this analysis. This included the studies by Harten and colleagues<sup>40</sup> (excluded because outcomes and care in the control arm were unclear), Challeng and colleagues (excluded because 6% HES may have been used in the control group),<sup>50</sup> and Tiryakioglu and colleagues (excluded because Jadad score was 2 and the incidence of outcomes of interest was not reported).<sup>43</sup>

Strengths of our review include a rigorous assessment of methodological quality of identified trials and selection of a homogeneous group of trials of direct relevance to perioperative medicine. The  $I^2$  statistic confirms a low risk of between-study heterogeneity, and this combined with narrow confidence intervals suggests that our findings are valid. There are also potential limitations of this analysis. We included trials of 6% HES solutions of any MW or substitution, and did not restrict inclusion to one particular HES product. It has been suggested that HES solutions with higher MW and greater substitution may be associated with an increased incidence of AKI and use of these solutions has declined in recent years. Included trials were mostly small single-centre trials with a greater possibility of bias.

Synthetic colloidal solutions were introduced in the 1960s,<sup>53</sup> without large phase III trials. Despite little published evidence suggesting advantages over other i.v. fluids, and emerging evidence of harm in septic and critically ill patients, they remain a popular choice for perioperative fluid therapy.<sup>40 50</sup> Although our systematic review did not demonstrate any harm associated with the use of 6% HES solutions, these findings cannot be considered definitive. The Crystalloid versus Hydroxyethyl Starch Trial (CHEST) and Scandinavian Starch for Severe Sepsis/Septic Shock (6S) trials have provided robust evidence to the critical care community that resuscitation of the critically ill with 6% HES was associated with an increased incidence of AKI.<sup>6 7</sup> Many surgical patients receiving HES are considered at high risk of both AKI and death and may require periods of critical care after their surgery. The findings of this analysis suggest that although there should be equipoise to conduct such a trial in surgical patients, the low event rates of both death and new requirement for RRT in the surgical population indicate that a very large clinical trial would be required to confirm the safety of starch solutions in surgical patient population.

## Conclusion

The principal finding of this study was that there was no difference in hospital mortality, requirement for RRT, or author-defined AKI associated with perioperative use of i.v. 6% HES solutions. Although most studies were small with low event rates, there was little between-study heterogeneity and narrow confidence intervals. A very large randomized trial of 6% HES solutions would be required to demonstrate either significant benefit or harm associated with the use of these solutions in surgical patients. Given the absence of demonstrable benefit, the clear risks in critically ill patients, and the additional cost over more widely used fluids, we are unable to recommend routine clinical use of 6% HES solution in surgical patients.

## Supplementary material

Supplementary material is available at *British Journal of Anaesthesia* online.

## Authors' contributions

All authors contributed to protocol design, data acquisition, analysis, and preparation of the manuscript.

## Declaration of interest

M.A.G. has received honoraria from LiDCO Ltd and Lilley & Co. M. Habicher, S.J., and M.S.: none declared. M.M. has received honoraria for speaking, or consultation, travel expenses, or both from Baxter, BBraun, Covidien, Fresenius-Kabi, Hospira, LiDCO. He is a National Clinical lead for the Department of Health Enhanced Recovery Partnership; Smiths Medical Professor of Anaesthesia and Critical Care UCL; Consultant to AQIX (start-up company with a novel crystalloid solution—pre-clinical); Director of Medical Defence Technologies LLC—('Gastrostim' patented); Co-Inventor of 'QUENCH' (pump) IP being exploited by UCL Business. M.M. has also received charitable donations and grants from Smiths Medical Endowment and Deltex Medical. M.M. is also co-author of the GIFTASUP guidelines on perioperative fluid management; a Board member of The Faculty of Intensive Care Medicine; Editor-in-Chief of *Perioperative Medicine*; on the Editorial Board of the *BJA* and *Critical Care*; a member of the Improving Surgical Outcomes Group; member of the NICE IV fluids guideline development group; and Co-Director Xtreme Everest. M. Hamilton has received lecturing fees, unrestricted educational grants, or both from Deltex Medical Ltd, Edwards Lifesciences and LiDCO Ltd. R.M.P. has received equipment loans from LiDCO Ltd, a research grant from Circassia Holdings Ltd and has performed consultancy work for Edwards Lifesciences, Covidien and Massimo, Inc. M.A.G. is a Chief Scientist Office (CSO) Scotland NHS Research Scheme Fellow. R.M.P. is a National Institute for Health Research (NIHR) Clinician Scientist.

## References

- 1 Pearse RM, Moreno RP, Bauer P, et al. Mortality after surgery in Europe: a 7 day cohort study. *Lancet* 2012; **380**: 1059–65
- 2 Weiser TG, Regenbogen SE, Thompson KD, et al. An estimation of the global volume of surgery: a modelling strategy based on available data. *Lancet* 2008; **372**: 139–44
- 3 Pearse RM, Ackland GL. Perioperative fluid therapy. *Br Med J* 2012; **344**: e2865
- 4 Finfer SF, Liu BF, Taylor CF, et al. Resuscitation fluid use in critically ill adults: an international cross-sectional study in 391 intensive care units. *Crit Care* 2010; **14**: R185
- 5 Ertmer C, Kampmeier T, Van Aken H. Fluid therapy in critical illness: a special focus on indication, the use of hydroxyethyl starch and its different raw materials. *Curr Opin Anaesthesiol* 2013; **26**: 253–60
- 6 Myburgh JA, Finfer S, Bellomo R, et al. Hydroxyethyl starch or saline for fluid resuscitation in intensive care. *N Engl J Med* 2012; **367**: 1901–11
- 7 Perner A, Haase N, Guttormsen AB, et al. Hydroxyethyl starch 130/0.42 versus ringer's acetate in severe sepsis. *N Engl J Med* 2012; **367**: 124–34



- 8 Brunkhorst FM, Engel C, Bloos F, et al. Intensive insulin therapy and pentastarch resuscitation in severe sepsis. *N Engl J Med* 2008; **358**: 125–39
- 9 Hecht-Dolnik M, Barkan H, Taharka A, Loftus J. Hetastarch increases the risk of bleeding complications in patients after off-pump coronary bypass surgery: a randomized clinical trial. *J Thorac Cardiovasc Surg* 2009; **138**: 703–11
- 10 Prowle JR, Pearse RM. Is it the end of the road for synthetic starches in critical illness? *Br Med J* 2013; **346**: 1805
- 11 Schortgen FF, Brochard L. Withdrawing synthetic colloids in sepsis is possible and safe. *Crit Care Med* 2012; **40**: 2709–10
- 12 Reilly C. Retraction. Notice of formal retraction of articles by Dr. Joachim Boldt. *Br J Anaesth* 2011; **107**: 116–7
- 13 Dart AB, Mutter TC, Ruth CA, Taback SP. Hydroxyethyl starch (HES) versus other fluid therapies: effects on kidney function. *Cochrane Database Syst Rev* 2010; **20**: CD007594
- 14 Gattas DJ, Dan A, Myburgh J, et al. Fluid resuscitation with 6% hydroxyethyl starch (130/0.4 and 130/0.42) in acutely ill patients: systematic review of effects on mortality and treatment with renal replacement therapy. *Intensive Care Med* 2013; **39**: 558–68
- 15 Patel A, Waheed U, Brett SJ. Randomised trials of 6% tetrastarch (hydroxyethyl starch 130/0.4 or 0.42) for severe sepsis reporting mortality: systematic review and meta-analysis. *Intensive Care Med* 2013; **39**: 811–22
- 16 Martin C, Jacob M, Vicaut E, Guidet B, Van Aken H, Kurz A. Effect of waxy maize-derived hydroxyethyl starch 130/0.4 on renal function in surgical patients. *Anesthesiology* 2013; **118**: 387–94
- 17 Van Der Linden P, James M, Mythen M, et al. Safety of modern starches used during surgery. *Anesth Analg* 2013; **116**: 35–48
- 18 Moher D, Liberati A, Tetzlaff J, et al. Preferred reporting items for systematic reviews and meta-analyses: the PRISMA statement. *PLoS Med* 2009; **6**: e1000097
- 19 Olivo SA, Macedo LG, Gadotti IC, Fuentes J, Stanton T, Magee DJ. Scales to assess the quality of randomized controlled trials: a systematic review. *Phys Ther* 2008; **88**: 156–75
- 20 Alavi SM, Ahmadi BB, Baharestani B, Babaei T. Comparison of the effects of gelatin, ringer's solution and a modern hydroxyl ethyl starch solution after coronary artery bypass graft surgery. *Cardiovasc J Afr* 2012; **23**: 428–31
- 21 Dehne MG, Muhling J, Sablotzki A, Dehne K, Sucke N, Hempelmann G. Hydroxyethyl starch (HES) does not directly affect renal function in patients with no prior renal impairment. *J Clin Anesth* 2001; **13**: 103–11
- 22 Diehl JT, Lester JL III, Cosgrove DM. Clinical comparison of hetastarch and albumin in postoperative cardiac patients. *Ann Thorac Surg* 1982; **34**: 674–9
- 23 Feldheiser A, Pavlova V, Bonomo T, et al. Balanced crystalloid compared with balanced colloid solution using a goal-directed haemodynamic algorithm. *Br J Anaesth* 2013; **110**: 231–40
- 24 Godet G, Lehot JJ, Janvier G, Steib A, De Castro V, Coriat P. Safety of HES 130/0.4 (voluven(R)) in patients with preoperative renal dysfunction undergoing abdominal aortic surgery: a prospective, randomized, controlled, parallel-group multicentre trial. *Eur J Anaesthesiol* 2008; **25**: 986–94
- 25 Gondos T, Marjanek Z, Ulakcsai Z, et al. Short-term effectiveness of different volume replacement therapies in postoperative hypovolaemic patients. *Eur J Anaesthesiol* 2010; **27**: 794–800
- 26 Guo X, Xu Z, Ren H, Luo A, Huang Y, Ye T. Effect of volume replacement with hydroxyethyl starch solution on splanchnic oxygenation in patients undergoing cytoreductive surgery for ovarian cancer. *Chin Med J* 2003; **116**: 996–1000
- 27 Hung M, Zou C, Lin F, Lin C, Chan K, Chen Y. New 6% hydroxyethyl starch 130/0.4 does not increase blood loss during major abdominal surgery. A randomized, controlled trial. *J Formos Med Assoc*, 2012, doi:10.1016/j.jfma.2012.08.002
- 28 Kuitunen AH, Hynynen MJ, Vahtera E, Salmenpera MT. Hydroxyethyl starch as a priming solution for cardiopulmonary bypass impairs hemostasis after cardiac surgery. *Anesth Analg* 2004; **98**: 291–7
- 29 Lee JS, Ahn SW, Song JW, Shim JK, Yoo KJ, Kwak YL. Effect of hydroxyethyl starch 130/0.4 on blood loss and coagulation in patients with recent exposure to dual antiplatelet therapy undergoing off-pump coronary artery bypass graft surgery. *Circ J* 2011; **75**: 2397–402
- 30 Mahmood A, Gosling P, Barclay R, Kilvington F, Vohra R. Splanchnic microcirculation protection by hydroxyethyl starches during abdominal aortic aneurysm surgery. *Eur J Vasc Endovasc Surg* 2009; **37**: 319–25
- 31 Marik PE, Iglesias J, Maini B. Gastric intramucosal pH changes after volume replacement with hydroxyethyl starch or crystalloid in patients undergoing elective abdominal aortic aneurysm repair. *J Crit Care* 1997; **12**: 51–5
- 32 Munsch CM, MacIntyre E, Machin SJ, Mackie IJ, Treasure T. Hydroxyethyl starch: an alternative to plasma for postoperative volume expansion after cardiac surgery. *Br J Surg* 1988; **75**: 675–8
- 33 Ooi JS, Ramzisham AR, Zamrin MD. Is 6% hydroxyethyl starch 130/0.4 safe in coronary artery bypass graft surgery? *Asian Cardiovasc Thorac Ann* 2009; **17**: 368–72
- 34 Sirvinskaskas E, Sneider E, Svagzdiene M, et al. Hypertonic hydroxyethyl starch solution for hypovolaemia correction following heart surgery. *Perfusion* 2007; **22**: 121–7
- 35 Van der Linden PJ, De Hert SG, Daper A, et al. 3.5% urea-linked gelatin is as effective as 6% HES 200/0.5 for volume management in cardiac surgery patients. *Can J Anaesth* 2004; **51**: 236–41
- 36 Van der Linden PJ, De Hert SG, Deraedt D, et al. Hydroxyethyl starch 130/0.4 versus modified fluid gelatin for volume expansion in cardiac surgery patients: the effects on perioperative bleeding and transfusion needs. *Anesth Analg* 2005; **101**: 629–34
- 37 Verheij J, Lingen A, Beishuizen A, et al. Cardiac response is greater for colloid than saline fluid loading after cardiac or vascular surgery. *Intensive Care Med* 2006; **32**: 1030–8
- 38 Ando Y, Terao Y, Fukusaki M, et al. Influence of low-molecular-weight hydroxyethyl starch on microvascular permeability in patients undergoing abdominal surgery: comparison with crystalloid. *J Anesth* 2008; **22**: 391–6
- 39 Belcher P, Lennox SC. Avoidance of blood transfusion in coronary artery surgery: a trial of hydroxyethyl starch. *Ann Thorac Surg* 1984; **37**: 365–70
- 40 Harten J, Crozier JE, McCreath B, et al. Effect of intraoperative fluid optimisation on renal function in patients undergoing emergency abdominal surgery: a randomised controlled pilot study. *Int J Surg* 2008; **6**: 197–204
- 41 Senagore AJ, Emery T, Luchtefeld M, Kim D, Dujovny N, Hoedema R. Fluid management for laparoscopic colectomy: a prospective, randomized assessment of goal-directed administration of balanced salt solution or hetastarch coupled with an enhanced recovery program. *Dis Colon Rectum* 2009; **52**: 1935–40
- 42 Shahbazi S, Zeighami D, Allahyari E, Alipour A, Esmaeili MJ, Ghaneie M. Effect of colloid versus crystalloid administration of cardiopulmonary bypass prime solution on tissue and organ perfusion. *Iran Cardiovasc Res J* 2011; **5**: 35–41
- 43 Tiryakioğlu O, Yıldız G, Vural H, Goncu T, Ozyazicioglu A, Yavuz S. Hydroxyethyl starch versus ringer solution in cardiopulmonary bypass prime solutions (a randomized controlled trial). *J Cardiothorac Surg* 2008; **3**: 45

- 44 Honkonen EL, Jarvela K, Huhtala H, Holm P, Lindgren L. Hyperosmolality does not modulate natriuretic peptide concentration in patients after coronary artery surgery. *Acta Anaesthesiol Scand* 2009; **53**: 565–72
- 45 Kasper SM, Walter M, Grune F, Bischoff A, Erasmi H, Buzello W. Effects of a hemoglobin-based oxygen carrier (HBOC-201) on hemodynamics and oxygen transport in patients undergoing pre-operative hemodilution for elective abdominal aortic surgery. *Anesth Analg* 1996; **83**: 921–7
- 46 Magder S, Potter BJ, Varennes BD, Doucette S, Fergusson D; Canadian Critical Care Trials Group. Fluids after cardiac surgery: a pilot study of the use of colloids versus crystalloids. *Crit Care Med* 2010; **38**: 2117–24
- 47 Olofsson CI, Gorecki AZ, Dirksen R, et al. Evaluation of MP4OX for prevention of perioperative hypotension in patients undergoing primary hip arthroplasty with spinal anesthesia: a randomized, double-blind, multicenter study. *Anesthesiology* 2011; **114**: 1048–63
- 48 Sirieix D, Hongnat JM, Delayance S, et al. Comparison of the acute hemodynamic effects of hypertonic or colloid infusions immediately after mitral valve repair. *Crit Care Med* 1999; **27**: 2159–65
- 49 Standl T, Burmeister MA, Horn EP, Wilhelm S, Knoefel WT, Schulte am Esch J. Bovine haemoglobin-based oxygen carrier for patients undergoing haemodilution before liver resection. *Br J Anaesth* 1998; **80**: 189–94
- 50 Challand C, Struthers R, Sneyd JR, et al. Randomized controlled trial of intraoperative goal-directed fluid therapy in aerobically fit and unfit patients having major colorectal surgery. *Br J Anaesth* 2012; **108**: 53–62
- 51 Mukhtar A, Aboulfetouh F, Obayah G, et al. The safety of modern hydroxyethyl starch in living donor liver transplantation: a comparison with human albumin. *Anesth Analg* 2009; **109**: 924–30
- 52 Bellomo R, Ronco C, Kellum JA, et al. Acute renal failure—definition, outcome measures, animal models, fluid therapy and information technology needs: the Second International Consensus Conference of the Acute Dialysis Quality Initiative (ADQI) Group. *Crit Care* 2004; **8**: R204–212
- 53 Murray GF, Solanke T, Thompson WL, Ballinger WF. Hydroxyethyl starch as a plasma expander in hemorrhagic shock. *Surg Forum* 1965; **16**: 34–5
- 54 Van der Linden P, Gazdzik TS, Jahoda D. A double-blind, randomized, multicenter study of MP4OX for treatment of perioperative hypotension in patients undergoing primary hip arthroplasty under spinal anesthesia. *Anesth Analg* 2011; **112**: 759–73

Handling editor: J. G. Hardman
